# Supplementary material for: Step-by-Step Design of New Theranostic Nanoformulations: Multifunctional Nanovectors for Radio-Chemo-Hyperthermic Therapy under Physical Targeting
Source: MDPI journal article supplement (doi:10.3390/molecules26154591), 2021-07-29
Supplement: s1 [file s1]

## Supplementary materials

### “Step-by-Step Design of New Theranostic Nanoformulations: Multifunctional Nanovectors for Radio-Chemo-Hyperthermic Therapy under Physical Targeting”

#### Mechanism of oxygen release from OLNBs

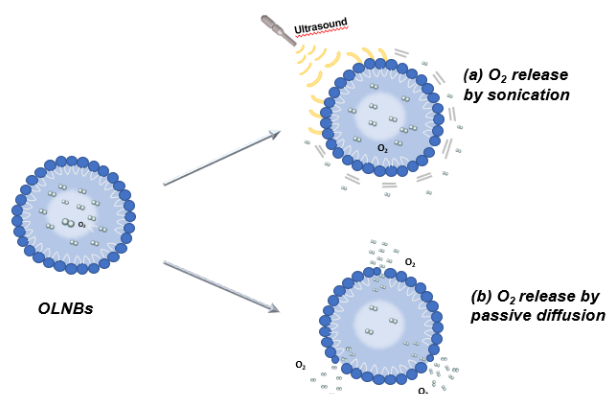

**Figure S1.** Graphical representation of the mechanism of oxygen release from OLNb core: by the application of an external stimulus, i.e., US (a) or by passive diffusion (b).

#### Oxygen Diffusion for Dextran-shelled OLNDs

Effective oxygen diffusion from OLNDs in tissues was confirmed by *in vivo* experiments performed by transcutaneous oximetry (tcpO<sub>2</sub>) and by photoacoustic imaging system on mouse legs. Details can be found in [30]. In the first case tcpO<sub>2</sub> was measured using a transcutaneous oximeter on the shaved abdomens of 8 mice before and after topical treatment with OLNDs in gel formulation followed by sonication ( $f=1\text{ MHz}$ ,  $P=5\text{ W}$ ,  $t=30\text{ s}$ ). Significant increases of tcpO<sub>2</sub> (up to 5-fold) were measured in the following 15 minutes and the effects were still evident after 1 hour.

In the second case the oxygen release from OLNDs was compared with that of empty NDs and saline fully saturated with oxygen when topically administered on the shaved hind limbs of 9 anesthetized mice. Oxy-Hb and deoxy-Hb were visualized by Vevo LAZR Photoacoustic Imaging System and the oxygenation effect of OLNDs proved effective and sustained up to 1 hour.

#### Magnetic Characterization of MOLNBs

Transverse relaxation ( $T_2$ ) values were obtained from exponential fitting of the signal. The signal intensity dependency on echo time (TE) is shown in Supplementary Figure 2.

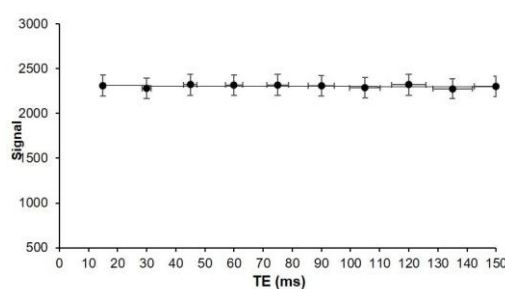

(a)

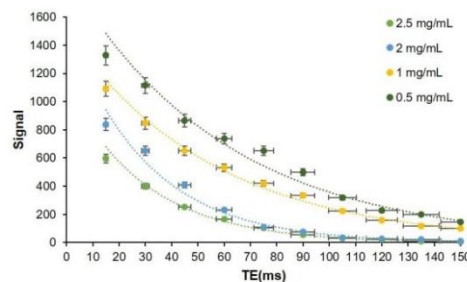

(b)

**Figure S2.** (a) Signal intensities of blank OLNBs at different TE value and (b) signal intensity of 0.5, 1, 2.0 and 2.5 mg/mL. SPIONs concentration on MOLNBs at different TE value as a function of echo delay time.  $T_2$  is inversely proportional to concentration of SPIONs loaded on MOLNBs, increased concentration shows a sharp reduction in the signal intensity. The error bars show SD.

### Magnetic Field and US Imaging Monitoring

Supplementary Figure 3 shows a configuration obtained by positioning two permanent magnets on one side of a plastic container (Figure S3a) and the lines of the magnetic field generated (Figure S3b), using [39].

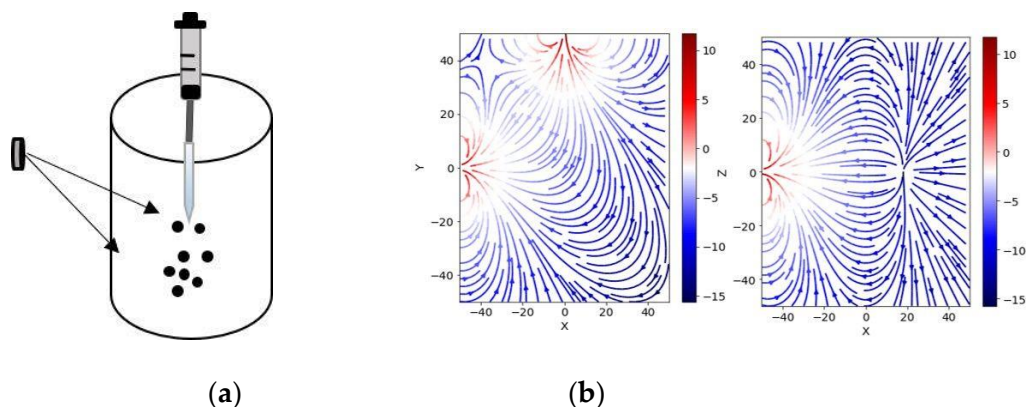

**Figure S3.** The setup used for the evaluation of the response of MOLNBs: (a) two magnets positioned on the side of the cylinder wall, at 4 cm distance from each other; (b) projections of magnetic field lines in the XY and XZ plane.

30. Prato, M.; Magonetto, C.; Jose, J.; Khadjavi, A.; Cavallo, F.; Quaglino, E.; Panariti, A.; Rivolta, I.; Benintende, E.; Varetto, G.; et al. 2H,3H-Decafluoropentane-Based Nanodroplets: New Perspectives for Oxygen Delivery to Hypoxic Cutaneous Tissues. *PLOS ONE* **2015**, *10*, e0119769, doi:10.1371/journal.pone.0119769.
39. Ortner, M.; Coliado Bandeira, L.G. Magpylib: A Free Python Package for Magnetic Field Computation. *SoftwareX* **2020**, *11*, 100466, doi:10.1016/j.softx.2020.100466.
